# Supplementary material
Source: Springer Nature journal article supplement (https://www.springermedizin.de/resource/supplementary/12879_2005_260_MOESM2_ESM.pdf/9448300)
Supplement: MOESM2 [file 9448300]

**Table 2** Associations of socio-demographic and health service factors with patients' delay

| Characteristics              | Delay<br>>31 days | No delay<br>≤30 days | Crude<br>OR (95%CI) | Adjusted<br>OR (95%CI) |
|------------------------------|-------------------|----------------------|---------------------|------------------------|
| <b>Sex</b>                   |                   |                      |                     |                        |
| Male                         | 91                | 111                  | 1.00                | 1.00                   |
| Female                       | 94                | 88                   | 1.19 (0.80, 1.79)   | 1.01 (0.62, 1.91)      |
| <b>Age</b>                   |                   |                      |                     |                        |
| 15-24                        | 49                | 78                   | 1.00                | 1:00                   |
| 25-44                        | 110               | 106                  | 1.65 (1.08, 2.58) * | 1.47 (0.86, 2.49)      |
| >45                          | 26                | 15                   | 2.76 (1.33, 5.72) * | 2.62 (1.13, 6.09) *    |
| <b>Residence</b>             |                   |                      |                     |                        |
| >10Km                        | 112               | 56                   | 3.92 (2.56, 6.00) * | 3.81 (2.21, 6.57) *    |
| ≤10Km                        | 73                | 14                   | 1.00                | 1:00                   |
| <b>Occupation</b>            |                   |                      |                     |                        |
| Farmers                      | 59                | 45                   | 1.00                | 1:00                   |
| Housewives                   | 44                | 42                   | 0.79 (0.45, 1.42)   | 1.36 (0.12, 1.03)      |
| Civil servants               | 21                | 38                   | 0.42 (0.22, 0.82) * | 0.61 (0, 17.2.19)      |
| Students                     | 11                | 24                   | 0.35 (0.16, 0.79) * | 0.40 (0.12, 1.32)      |
| Unemployed                   | 32                | 23                   | 1.06 (0.55, 2.06)   | 0.96 (0.35, 2.66)      |
| Self employed                | 18                | 27                   | 0.51 (0.25, 1.03)   | 0.78 (0.26, 2.34)      |
| <b>Marriage</b>              |                   |                      |                     |                        |
| Single                       | 59                | 75                   | 1.00                | 1.00                   |
| Divorced                     | 45                | 44                   | 1.30 (0.76, 2.22)   | 1.39 (0.72, 2.67)      |
| Married                      | 74                | 66                   | 1.43 (0.89, 2.29)   | 1.30 (0.69, 2.42)      |
| Widowed                      | 7                 | 14                   | 0.64 (0.24, 1.68)   | 0.69 (0.22, 2.16)      |
| <b>Education</b>             |                   |                      |                     |                        |
| Illiterate                   | 91                | 66                   | 1.00                | 1.00                   |
| 1-8 <sup>th</sup> grade      | 70                | 75                   | 0.68 (0.43, 1.07)   | 1.38 (0.67, 2.83)      |
| 9 <sup>th</sup> and above    | 24                | 58                   | 0.30 (0.17, 0.53) * | 1.47 (0.75, 2.87)      |
| <b>Health provider visit</b> |                   |                      |                     |                        |
| Formal                       | 47                | 100                  | 1.00                | 1.00                   |
| Non-formal                   | 138               | 99                   | 2.97 (1.93, 4.57) * | 0.34 (0.20, 0.57) *    |
| <b>Income</b>                |                   |                      |                     |                        |
| No income                    | 100               | 85                   | 1.00                | 1.00                   |
| Irregular income             | 54                | 60                   | 0.77 (0.48, 1.22)   | 1.30 (0.43, 3.90)      |
| 1-300 Birr                   | 14                | 22                   | 0.54 (0.26, 1.12)   | 0.57 (0.16, 1.98)      |
| >301birr                     | 17                | 32                   | 0.45 (0.23, 1.87)   | 0.49 (0.17, 1.46)      |
| <b>Self-treatment</b>        |                   |                      |                     |                        |
| Yes                          | 121               | 59                   | 1.75 (1.16, 2.62) * | 1.69 (1.04, 2.75) *    |
| No                           | 110               | 94                   | 1.00                | 1.00                   |
| <b>Knowledge of TB</b>       |                   |                      |                     |                        |
| Low                          | 100               | 60                   | 2.72 (1.79, 4.14) * | 1.89 (1.15, 3.10) *    |
| High                         | 85                | 139                  | 1.00                | 1:00                   |
| <b>Stigma</b>                |                   |                      |                     |                        |
| Low                          | 67                | 66                   | 1:00                | 1:00                   |
| High                         | 118               | 133                  | 0.87 (0.57, 1.33)   | 0.88 (0.54, 1.45)      |

Significant at &lt;0.05

Income group: 1) no income (housewife, students, unemployed); 2) irregular income (farmers); 3) regular income of 1-300 Birr per month (civil servants); 4) regular income of >300 Birr per month (civil servants).
